# Supplementary material for: Lavender Essential Oil Modulates Hepatic Cholesterol Metabolism in HepG2 Cells
Source: MDPI journal article supplement (doi:10.3390/cimb45010026), 2023-01-03
Supplement: s1 [file s1]

## Supplementary Materials

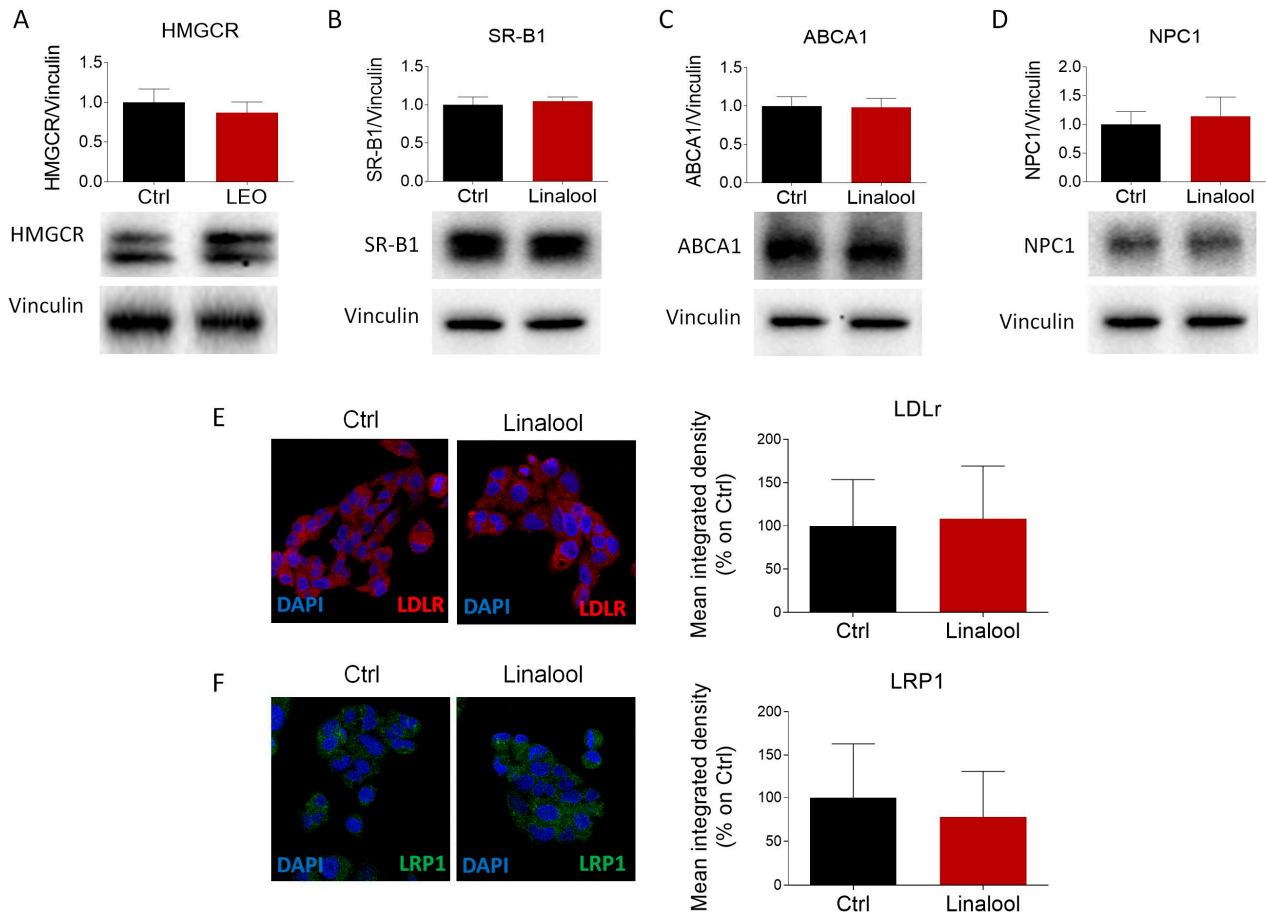

**Figure S1.** Linalool administration does not alter the expression of the main proteins and enzymes of cholesterol homeostasis. (A-D) HepG2 cells were cultured in presence of vehicle (Ctrl) or linalool (0.0018%) for 24 hours. Subsequently, Western blot and densitometric analysis of HMGCR, SR-B1, ABCA1 and NPC1 proteins was carried out.  $n = 3$  independent experiments. Vinculin served as a housekeeping protein to normalize protein loading. (E-F) Immunofluorescence and confocal analysis for LDLr (red) and LRP1 (green) protein (left panel) and mean integrated density evaluation (right panel) in HepG2 cells. Nuclei were counterstained with DAPI.  $n = 6$  different experiments. Data represent means  $\pm$  SD. Statistical analysis was performed by using unpaired Student's t-test.

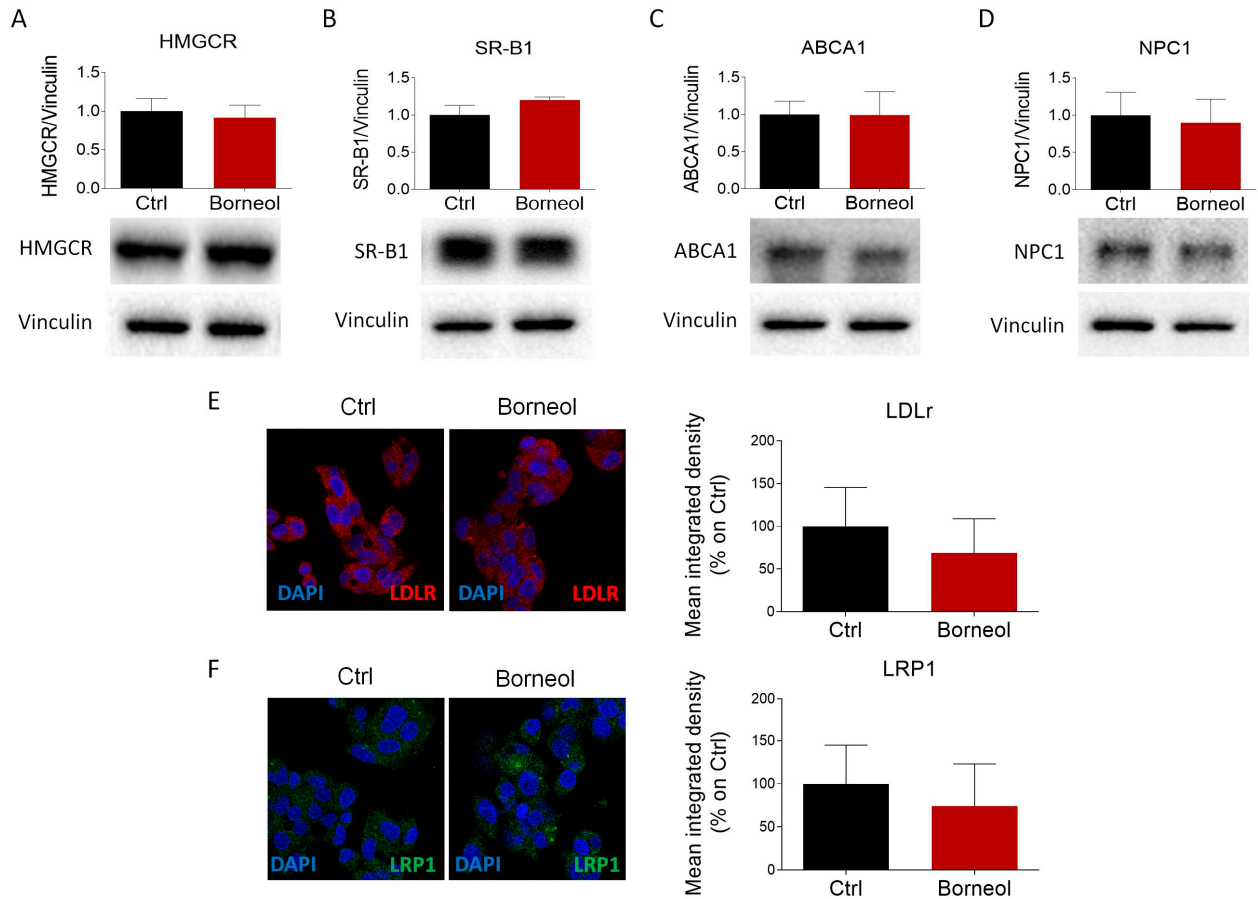

**Figure S2.** Borneol (0.00097%) treatment for 24 hours does not influence the expression of proteins belonging to cholesterol regulatory network. (A-D) Representative Western blot and densitometric analysis of HMGCR, SR-B1, ABCA1 and NPC1 proteins. Vinculin was chosen as loading control.  $n = 3$  independent experiments. (E-F). Representative immunofluorescence (left panel) and relative quantification of LDLr (red) and LRP1 (green) intensity (right panel). Nuclei were counterstained with DAPI.  $n = 6$  different experiments. Data represent means  $\pm$  SD. Statistical analysis was performed by using unpaired Student's t-test.
